1 Sequential exposure to a combination of stressors blocks memory reconsolidation in  
2 *Lymnaea*

3

4 Shawn Xavier Dodd and Ken Lukowiak\*

5 Hotchkiss Brain Institute, Cumming School of Medicine, University of Calgary, 3330 Hospital  
6 Drive NW, Calgary, AB, Canada T2N 4N1

7

8 \* Corresponding author: lukowiak@ucalgary.ca

9 Key Words: Stress, Long-term memory, *Lymnaea*, reconsolidation

10

11

12 Abstract: 148

13 Word count:4233

14

**ABSTRACT:**

Stress alters the formation of long-term memory (LTM) in *Lymnaea*. When snails are exposed to more than one stressor, however, how the memory is altered becomes complicated. Here we investigated how multiple stressors applied in a specific pattern affect an aspect of memory not often studied in regards to stress - reconsolidation. We hypothesized that the application of a sequence of stressors would block the reconsolidation process. Reconsolidation occurs following activation of a previously formed memory. Sequential crowding and handling were used as the stressors to block reconsolidation. When the two stressors were sequentially presented immediately following memory activation reconsolidation was blocked. However, if the sequential presentation of the stressors was delayed for 1h after memory activation reconsolidation was not blocked. That is, LTM was observed. Finally, presentation of either stressor alone did not block reconsolidation. Thus stressors can block reconsolidation, which may be preferable to pharmacological manipulations.

(148)

**KEYWORDS:** *Lymnaea stagnalis*, long-term memory, reconsolidation, crowding

## INTRODUCTION

Numerous studies have shown in humans and rodents, as well as in our model system, *Lymnaea*, that stress plays important and complex roles in learning and memory (Lukowiak et al., 2014). Stressors can either impair or enhance learning and memory. The specific effect of a stressor on memory depends on many factors including the specific type of stressor, the time at which the stressor is experienced, the nature of the behaviour, the arousal state of the subject, and characteristics of the subject such as sex and age (Shors, 2004, Kim and Diamond, 2002). We have used our simpler *Lymnaea* model to overcome many of these complications when studying the effects of stress on memory (Lukowiak et al., 2008; 2010; 2014). In reviewing the literature it is apparent that there is not an abundance of literature describing the effects of stress on one aspect of memory, the reconsolidation process (Akirav and Maroun, 2013). Memory reconsolidation is the process by which a memory is destabilized by its retrieval and becomes modifiable (Misanin et al., 1968, Nader et al., 2000a). The reason stressors may not have been used in reconsolidation studies might be that other interventions work better than stress or that inappropriate stressors have been utilized that do not interfere with reconsolidation.

Memories are dynamic; they can be strengthened, weakened or even modified (i.e. changed or altered) after they have been formed (Nader et al., 2000a,b, Dudai, 2006; Lukowiak et al., 2007; Reichelt and Lee, 2013). One modifying mechanism is the reconsolidation process. For example, in *Lymnaea*, following activation of a memory placing snails into a different context during the reconsolidation period results in the reconsolidated memory being updated so that snails have a memory for the new context (i.e. memory infidelity) even though they received no training in that context (Lukowiak et al., 2007). This is similar to the idea of the implantation of a false memory (e.g. ‘Bugs Bunny at Disneyland’) following activation of a previously consolidated memory in humans (Loftus 2003; Schacter, 1999).

An idea that has attracted much attention is the notion that it might be possible to use an understanding of the neuronal basis of the memory reconsolidation to treat a number of ‘memory disorders’ such as phobias, post traumatic stress disorder (PTSD) and substance abuse. (Debic, 2012; Agren, 2014). It was hypothesized that administration of propranolol (a beta-adrenoceptor

antagonist) after memory retrieval would disrupt the reconsolidation process and could thus effectively treat PTSD, etc. This treatment has worked in animal models (e.g. contextual fear; Abrari et al. 2008; Debiec and Ledoux 2004) and in some cases in humans suffering from PTSD (Pitman et al. 2002; Pitman and Delahanty 2005; Brunet et al. 2008; 2011; Soeter and Kindt, 2011; 2013). However, more recent, larger studies have not found a significant effect of propranolol administration after trauma (Sharp et al., 2010; Parsons and Ressler, 2013). Thus new strategies are needed in the hope of alleviating such ‘memory disorders’.

A possible avenue of research would be to explore the possibility that behavioural rather than pharmacological procedures be used to block reconsolidation. In performing a series of experiments examining the role of how repeated presentations of a stressor altered memory formation we found we could block reconsolidation in *Lymnaea* by behavioural means. In *Lymnaea* ecologically relevant stressors alter LTM formation (Lukowiak et al., 2010; 2014). Depending on the specific stressor used LTM formation can either be enhanced or suppressed. For example, predator detection enhanced LTM formation. That is, snails exposed to predator scent form LTM (i.e. a memory lasting at least 24h) with a single 0.5h training session whereas, in the absence of the predator the memory only persists for a few hours. In addition, snails exposed to the predator scent and trained with a procedure that normally only results in LTM persisting for 24h now exhibit enhanced memory that persists for 8 days (Orr et al., 2007; 2008; 2009a,b; Orr and Lukowiak, 2008). On the other hand two other environmentally relevant stressors, crowding and a low concentration of calcium in pond water, block LTM formation even though snails do exhibit learning (de Caigny and Lukowiak, 2008a; Dalesman et al., 2011a,b,d). That is, snails exposed to these stressors and trained with procedures that in control snails result in LTM do not exhibit LTM even though they learn. While these two stressors block LTM formation they do so via different sensory pathways (Dalesman et al., 2011). Thus, the sensory pathway that is necessary to detect hypoxic pond water and low environmental calcium pond water (osphradial nerve input) is not how snails sense crowding (Dalesman et al., 2011a,c,e; Karnik et al., 2012). Our current working hypothesis is that it is the mucous that snails detect that signal overcrowding. Currently we are unable to predict ahead of time whether a specific stressor will enhance or block LTM formation. As such, empirical evidence regarding the effect of a stressor is required in order to characterize the effect that a specific stressor will have on LTM formation potential. Finally, in a similar manner we are unable to predict the

outcome of what will happen to memory formation when a combination of stressors are used, even though we know the effect of each individual stressor on LTM formation (Dalesman et al, 2013). Here we used a combination of stressors: crowding and handling. Sequential exposure (i.e. snails are handled multiple times) to handling and crowding blocked reconsolidation when they were applied immediately after a memory retrieval session. If, however, we allowed a 1h interval between reactivating the memory and the application of the sequential stressors reconsolidation was not blocked. Finally, application of handling or crowding singly after memory activation did not block reconsolidation.

## RESULTS

In the initial experiments shown in Figure 1 either the crowding (Fig 1,Top) or the handling (Fig 1, Bottom) stimulus was presented to naive snails before the operant conditioning training procedure to determine the effect the respective stimuli had on both intermediate-term (ITM) and long-term memory (LTM) formation. Memory was operationally defined as a significant reduction in the number of attempted pneumostome openings in the training session (TS) or memory test session (MT), compared to the first training session. Additionally, the number of attempted pneumostome openings in the MT must not be significantly greater than the number of attempts in TS2 (Lukowiak et al., 1996; 1998; 2000).

Naive snails were crowded for 1h prior to training. Immediately following the crowding stimulus, snails received two 0.5h training session (TS1 and TS2 respectively), separated by an hour. Following the second training session, snails were returned to their home eumoxic aquarium. Snails were tested for LTM 24h later (MT). Here we found that crowding blocked both ITM and LTM. That is, the number of attempted pneumostome openings in TS2 (i.e. ITM) was not statistically smaller than TS1. Likewise the number of attempted openings in MT was not significantly different than TS1.

We next performed a similar experiment on another cohort of naive snails. However, these snails were exposed to the repeated handling stimulus. Here we see that both ITM and LTM were formed. That is, the number of attempted openings in TS2 was significantly less than TS1. Moreover, the number of attempted openings in MT was significantly less than in TS1 and was not significantly greater than TS2. Thus, the repeated handling of snails is not sufficient by itself to block formation of either ITM or LTM.

### Sequential crowding blocks memory reconsolidation

The experimental protocol used in the experiments reported here is shown in Figure 2. The details of how snails were crowded and handled are reported in the Methods section. In order to be able to investigate whether sequential handling and crowding (handling and crowding combined) blocked memory reconsolidation we employed this training procedure. Snails

underwent a total of five 0.5h training/memory testing sessions in hypoxic pond water over the course of 3 days. The first two training sessions (TS1 and TS2) are separated by a 1h interval. The next two sessions (TS3 and TS4) each occurred with an interval of 24h. We have designated the 5th session as a memory test session (MT) for us to determine if reconsolidation occurred. The training and memory test sessions are similar in that each time the snail attempts to open its pneumostome a tactile stimulus is presented to the pneumostome area to prevent opening of the pneumostome. To determine if the sequential handling-crowding stressor blocks reconsolidation, we presented this sequential stressor immediately after the TS4 session.

To demonstrate that the training procedure shown in Figure 2 results in LTM in MT the sequential stressor handling and crowding procedure was not presented to the snails after TS4 (Figure 3 top). The data are unambiguous. First, 24h after TS2 the number of attempted openings (i.e. TS3) is significantly lower than TS1 and not significantly greater than TS2. Thus, LTM is present. The same holds for the data obtained 24 later (i.e. TS4). Finally, 4h after the activated TS4 memory, LTM was demonstrated in MT. The number of attempted pneumostome openings in MT was significantly less than in TS1 and not significantly greater than in TS2, TS3 or TS4.

Using the same training procedure we asked whether the interposition of the sequential handling and crowding procedure would block reconsolidation. Thus, following TS4 snails were immediately subjected to the sequential crowding and handling sequence. (Fig. 3 Bottom). As can be seen following the sequential handling and crowding procedure LTM was not observed. That is, the number of attempted pneumostome openings in MT was not significantly lower than in TS1 and was significantly greater than the number of attempted openings in each of the previous training sessions (i.e. TS2, TS3, and TS4). Thus, memory reconsolidation was blocked, as LTM was not observed.

In the previous experiment LTM was tested for 4h after TS4 and the interposition of the sequential stressors. Thus, it was possible that the reconsolidation process may not have been completed in that period of time. We therefore trained snails in the exact same manner, except that LTM was tested 24h after TS4 (Figure 4, Top). Again we found that reconsolidation was blocked, as LTM was not present. Thus, snails immediately subjected to the sequential handling

and crowding procedure following memory activation did not exhibit LTM showing that we blocked reconsolidation.

In the above experiments the sequential handling and crowding procedure was applied to the snails immediately following the TS4 session and it blocked the reconsolidation process. Previously, in *Lymnaea* Sangha et al., (2003a,b,c) showed that procedures that blocked the consolidation and reconsolidation processes had to be applied immediately after the memory was re-activated, if a delay of 1h or more occurred the reconsolidation process was not blocked (i.e. LTM was seen). We therefore wished to see whether delaying the presentation of the sequential handling and crowding procedure for 1h after memory was reactivated (i.e. TS4) would fail to block reconsolidation. These data are shown in Figure 4 bottom. If we waited 1h after TS4 the sequential handling and crowding procedure did not block reconsolidation. Thus, delaying the presentation of this sequential stressor allowed the reconsolidation process to occur.

### **Prolonged crowding does not block reconsolidation**

We next sought to investigate whether reconsolidation was blocked with just one of the stressors. We initially exposed snails to just crowding. In this experiment, following TS4 snails were immediately crowded for 1h (Fig. 5 Top). As can be seen LTM was present. Thus, the reconsolidation process was not blocked with a single 1h exposure to crowding.

It was possible, however, that a longer period of crowding as experienced in the sequential handling-crowding procedure could block the reconsolidation process. Thus, we trained another naive cohort of snails (Fig. 5 middle) in a similar manner but now following TS4 snails were subjected to a 3h ‘prolonged’ crowding procedure. The total time of crowding was equivalent to that experienced in the sequential crowding-handling procedure. However, as with just the 1h of crowding LTM was observed. Thus, just crowding was not sufficient to block the reconsolidation process.

### **Handling snails does not block snails’ ability to recall memory**



As the sequential crowding procedure required snails to be frequently handled, we investigated whether such handling of snails was sufficient to block reconsolidation. Handling was investigated by repeating sequential handling with a reduced crowding density (8 snails in 100mL of pond water) (Fig. 5 bottom). This altered protocol alleviated the severity of the crowding stress while allowing handling frequency to remain unchanged. We subjected snails to this 'handling' procedure immediately following TS4. As is apparent such a handling procedure did not block the reconsolidation process as snails expressed LTM.

## DISCUSSION

We tested the hypothesis that a combination of stressors, sequential handling and crowding, if applied to snails immediately following memory activation is sufficient to block reconsolidation. We report here that the sequential handling and crowding procedure blocks reconsolidation, but only if the procedure was applied immediately after memory activation. Further, neither handling nor crowding by itself were sufficient to block reconsolidation. This finding is important in that it shows that a behavioural procedure is sufficient to block the reconsolidation process.

In *Lymnaea* it is known that various stressors modify LTM formation (Lukowiak et al., 2014). Some stressors enhance LTM formation (e.g. Predator detection (CE); Orr et al., 2009; thermal stress; Teskey et al., 2012). That is, following a 60 minute exposure to 30° C pond water a single 0.5h training session results in LTM formation that persists for up to 2 days. However, as pointed out above other stressors (e.g. low environmental calcium or crowding; Dalesman et al., 2011; de Caigny and Lukowiak, 2008a; Knezevic et al., 2011) block LTM formation. In our *Lymnaea* studies, as well as in other animals, the typical experiment only assesses the effect of a single stressor on memory formation or its recall. However, in ‘real-life,’ animals, including humans, are faced with multiple sources of stress, both sequentially and in combination. We have become interested in how learning and memory in *Lymnaea* would respond to multiple stressors. For example, can we predict how different stressors will interact to alter learning and memory based on their individual effects? To address this question, we have combined exposure to different stressors, where we know their individual effects on memory. It appears that the interaction of stressors on memory demonstrates emergent properties. For example, CE enhances LTM formation whereas crowding suppresses LTM formation. When *Lymnaea* were crowded and then exposed to CE we found that crowding effectively ‘trumped’ the effects of CE, blocking the memory-enhancing effects of predator detection (de Caigny and Lukowiak, 2008b). However, when we combined low calcium pond water which blocks LTM formation with CE we found that CE allowed LTM to form; although a more persistent LTM was not observed. Thus, in that situation the effects of each stressor appear to cancel each other out (Dalesman and Lukowiak 2011b). We have also shown that social isolation of snails alters how they respond to a stressor and as mentioned above, low environmental calcium blocks LTM formation. However, in

237 socially isolated snails the low calcium environment no longer blocks LTM formation (Dalesman  
238 and Lukowiak, 2011a). Finally, when we combined two stressors (low calcium and crowding)  
239 that on their own block LTM formation but not learning we found that all memory processes  
240 (short-term memory (STM persisting 10 min); ITM and LTM) were blocked (Dalesman et al.,  
241 2013). Thus, stressors applied in combination have powerful effects on all aspects of memory  
242 formation in *Lymnaea*. Interestingly, the notion that stressors in *Lymnaea* could alter the  
243 reconsolidation process had not previously been examined.

244  
245 Reconsolidation demonstrated that a LTM once formed could again be made labile and  
246 susceptible to disruption upon its reactivation (Misanin et al., 1968; Eisenberg et al. 2003; Nader  
247 et al. 2000a, b; Sara 2000). Typically, amnestic agents (e.g. protein synthesis blockers,  
248 transcriptional blockers; beta blockers) are applied either just before or after memory reactivation  
249 and these agents result in the loss of memory; that is, reconsolidation is blocked (Schwabe et al.,  
250 2012; Reichelt and Lee, 2013; Soeter and Kindt, 2013). If however, the amnestic agent is not  
251 present, new information can be incorporated into the pre-existing memory trace, which can lead  
252 to memory infidelity (Loftus 2003; Schacter, 1999; Dudai, 2006). In *Lymnaea* reconsolidation has  
253 been demonstrated, with amnestic agents as diverse as cooling, protein synthesis blockers, and  
254 removal of the soma of a single neurone that is necessary for LTM formation (Scheibenstock et  
255 al., 2002; Sangha et al., 2003c). In addition, because the reconsolidation process is present in  
256 *Lymnaea* it allowed the implantation of a false memory (Lukowiak et al., 2007).

257 Given that reconsolidation occurs, it was thought that an understanding of how it occurs at the  
258 neuronal level would be of great use to treat PTSD and other ‘memory problems’ (Parsons and  
259 Ressler, 2013). However, because the use of the typical protein synthesis inhibitors is not  
260 feasible for the ethical treatment of humans, researchers examined other possible  
261 pharmacological agents. One such agent was the beta-blocker propranolol, since it is probable  
262 that the adrenergic system is involved in at least certain aspects of the stressful event and also  
263 because propranolol may inhibit noradrenergic-stimulated CREB phosphorylation, a necessary  
264 pathway involved in memory consolidation (Thonberg et al., 2002; Sadamoto et al., 2003; Azami  
265 et al., 2006). Systemic administration of propranolol in conjunction with memory reactivation  
266 disrupts reconsolidation of LTM in auditory and contextual fear and avoidance in rodents (Abrari  
267 et al. 2008; Debiec and Ledoux 2004; Debiec et al., 2011; Przybylski et al. 1999). In some

human patients propranolol has been successfully used to treat PTSD in conjunction with memory activation (Brunet et al. 2008; Orr et al. 2006; Pitman et al. 2002; Pitman and Delahanty 2005). However, in subsequent larger trials studies have not found a significant effect of propranolol administration after trauma (Sharp et al., 2010; Parsons and Ressler, 2013).

We choose here a non-pharmacological approach, stressors in combination, to disrupt reconsolidation. However, sparse evidence indicates a critical role of stress in modulating reconsolidation. One study (Maroun and Akirav, 2008) has shown that stress might have an inhibitory effect on the reconsolidation process. In humans, Schwabe and Wolf (2010) showed that a cold stressor test (immersing a hand in cue-water for 3 minutes) following activation of a memory impaired some, but not all, long-term memories. Interestingly, emotional memories were not affected. However, another study (Cocoz et al., 2011) using a similar stressor found that this stressor when applied after memory re-activation strengthened the memory. Similar findings have been found in a number of other studies (Fukushima et al., 2014).

Our results are unambiguous, only the presentation of the sequential crowding procedure was sufficient to block reconsolidation (Figs 3-5). Moreover, the sequential crowding procedure only blocked reconsolidation when it was administered to the snails immediately after memory reactivation. Delaying the presentation of the sequential crowding procedure for as little as 1h following memory reactivation did not block reconsolidation. This finding is consistent with previous data concerning the reconsolidation process in *Lymnaea*. Delaying the various agents or procedures that successfully blocked reconsolidation for 1h after memory activation did not block reconsolidation (Sangha et al., 2003c). Thus, there is in *Lymnaea* only a limited temporal opportunity to employ stress to block reconsolidation.

Our data show that individually each stressor, could not separately block reconsolidation. In fact, on its own, handling did even not block the initial consolidation process. This raises an interesting point alluded to above (i.e. emergent properties of combined stressors). When combined with another stressor a stimulus may take on properties (blocking memory processes) that on its own it does not possess. Based on our behavioural data it is likely that environmental stimuli that result in greater stress may be required to block reconsolidation than are needed to block the initial consolidation process. These data are consistent with the general consensus that

reconsolidation does not recapitulate all the aspects of the consolidation process (Nader and Hardt 2009; Alberini 2011). That is, the molecular processes in neurons underlying reconsolidation are more resistant to the modifying effects of stress. Our findings may help to explain why some stressors have not previously been effective in blocking reconsolidation.

Our study is the first to investigate the effects of a repeated sequential presentation of multiple stressors on memory reconsolidation using *Lymnaea*. Since we know that reconsolidation is dependent on molecular processes occurring in an identified neurone, RPeD1 (Sangha et al., 2003c; Braun et al., 2012), we may be able to obtain neuronal correlates of how the sequential handling-crowding procedure blocks reconsolidation and thus cause forgetting of memory.

## METHODS

### *Lymnaea stagnalis*

Originally collected near Utrecht, Netherlands in the 1950's, *Lymnaea stagnalis* have been bred in the laboratory for close to 300 generations (Orr et al., 2007; 2009). Laboratory-bred adult snails are used for experimentation and were raised at the Biological Sciences snail facility at the University of Calgary. The snails were stored in aquariums containing approximately five litres of eumoxic (i.e. normal O<sub>2</sub> levels; P<sub>O<sub>2</sub></sub>>9975 Pa), artificial pond water (distilled water with 0.26 g l<sup>-1</sup> Instant Ocean, Spectrum Brands, Madison, WI, USA and 80 mg l<sup>-1</sup> of calcium sulphate dehydrate; Dalesman and Lukowiak, 2010). Each aquarium contained ten snails and snails were fed the leafy portion of Romaine lettuce. Water from the home aquarium was changed weekly. Air was bubbled continuously through the water in the aquariums that were kept at room temperature (~20°C).

### **Operant conditioning of aerial respiratory behaviour and the classification of long-term memory (LTM) and intermediate-term memory (ITM)**

Snails are bimodal breathers where cutaneous respiration normally predominates (Lukowiak et al., 1996). The other mode of respiration, aerial respiration (Syed et al., 1990; 1992), is increased by placing snails in hypoxic pond water. To perform aerial respiration, snails come to the surface and open their pneumostome, their breathing tube, allowing atmospheric air to come into contact with the lung (Lukowiak et al., 2003). Hypoxic pond water (P<sub>O<sub>2</sub></sub><931 Pa) is produced by bubbling nitrogen gas vigorously through 500mL of pond water in a one-litre beaker for 20 minutes. After 20 minutes, the flow rate of nitrogen gas was reduced to a level where bubbling did not disturb the snails. Snails were then introduced to the hypoxic water where they acclimatized for 10 minutes. The hypoxic water caused an increase in aerial respiratory behaviour. Following the 10-minute acclimatization period, the snails were subjected to a 0.5h operant conditioning session known as a training session (TS). A training session consisted of applying a gentle tactile stimulus to the pneumostome as it attempted to open. The stimulus was forceful enough to ensure that the pneumostome did not open but not so forceful that the snail

underwent a full body withdrawal. The number of attempted pneumostome openings over the course of the 0.5h training session was recorded. Following the first training session (TS1), snails were returned to eumoxic water ( $PO_2 > 9975$  Pa) in their home aquarium. A second training session (TS2) occurred 1h after the first training session. A subsequent training session (TS3) occurred 24h later. Finally 24h after TS3 memory was reactivated (MT1) and then at a specified interval a second memory reactivation occurred (MT2).

Memory was operationally defined as a significant reduction in the number of attempted pneumostome openings in the session, compared to the first training session. Additionally, the number of attempted pneumostome openings in the memory test sessions (MT1 and MT2) must not be significantly greater than the number of attempts in the second (TS2), or, if more than two training sessions (TS3 and TS4), the last training sessions (Lukowiak et al., 1998; 2000).

### **Crowding**

Previously it was shown (de Caigny and Lukowiak, 2008a) that LTM formation was blocked following crowding (20 snails in 100mL of pond water) for 1h before training. Following crowding, snails were placed in hypoxic water for 10 minutes to acclimatize before the 0.5h memory test.

### **Handling**

To investigate how the repeated handling stressor altered LTM formation snails were given a total of 5 training/memory test sessions. Handling was investigated by repeating sequential handling with a reduced crowding density (8 snails in 100mL of pond water) between each training/memory test session.

### **Experimental protocol for sequential handling and crowding**

To investigate the effects of sequential crowding on long-term memory (LTM), naïve snails underwent a total of five training sessions (Figure 2). The initial two training sessions were separated by one hour and the subsequent three training sessions were each separated by 24

hours. In order to determine whether sequential exposure to handling and crowding alters LTM, snails were sequentially handled and crowded immediately following the initial memory activation session (MT1). Sequential handling and crowding is performed by introducing snails to crowded conditions (20 snails in 100mL of pond water) for one hour and then transferring snails to a beaker containing 500mL of eumoxic pond water for 20 minutes. This crowd and rest sequence was repeated for a total of three cycles. During the final rest period, snails were placed in eumoxic pond water for 10 minutes and then into hypoxic water for 10 minutes to acclimatize for a 0.5h memory session.

## Statistics

The number of attempted pneumostome openings in each training session was compared using repeated measures analysis of variance (RM-ANOVA). Data was tested for equal variance using Mauchly's test for sphericity or Greenhouse-Geisser P values if sphericity could not be assumed. Tukey post-hoc test was performed for pairwise comparisons. Significance was considered to be at least  $p < 0.05$ . Statistical analysis was performed using Prism 6.



## Figure Legends

Figure 1. Top: A cohort of naive snails ( $n = 9$ ) was crowded before operant conditioning training. Snails received two 0.5h training sessions (TS1 and TS2) separated by a 1h interval. Twenty-four hours later they were treated for LTM (MT). An ANOVA ( $F_{2,16} = 1.354$ ,  $p < 0.05$ ) showed that TS2 was not statistically different than TS1 nor was MT statistically different from TS1. Thus crowding before training in this cohort results in blockade of memory formation. Bottom. As above ( $n = 8$ ) only in this case the handling procedure preceded the operant conditioning training. However, here ( $F_{2,30} = 5.278$ ,  $p < 0.05$ ) both ITM and LTM were observed. That is TS2 was significantly less than TS1 and MT was also significantly less than TS1 and was not significantly greater than TS2. Values are means  $\pm$  s.e.m. \*\*Significant difference from TS1 ( $p$  at least  $< 0.05$ )

**Figure. 2. Experimental protocol for sequential exposure to crowding.** Snails underwent a total of five 0.5h training sessions in hypoxic pond water resulting in the formation of LTM. The initial two training sessions were separated by an hour and subsequent training sessions were separated by 24 hours. Between the fourth and fifth sessions, snails were exposed to the assigned stressor.

Figure 3. The training procedure described in Figure 2 and reconsolidation. Top. In this naive cohort of snails ( $n = 20$ ) the training procedure results in LTM. An ANOVA ( $F_{4,64} = 6.599$ ,  $p < 0.05$ ) showed that both ITM and LTM formed, as TS2 was significantly less than TS1. In addition TS3, TS4 and MT were all significantly less than TS1 and not greater than TS2. These data also show that the number of attempted openings 4h after TS4 meet the criteria for LTM. Bottom. A new cohort of naive snails ( $n = 20$ ) received the training as above. However, in this cohort the sequential handling and crowding combined stressor was given to the snails immediately after TS4. An ANOVA ( $F_{4,76} = 13.559$ ,  $p < 0.05$ ) showed that as above both ITM (TS2) and LTM (TS3 and TS4) were observed. However LTM was not observed in MT. That is, MT was not statistically different from TS1 and was statistically greater than TS3 and TS4.

Thus, the sequential stressor blocked reconsolidation when LTM was tested 4h after TS4. Values are means  $\pm$  s.e.m. \*\*Significant difference from TS1 (p at least  $<0.05$ )

Figure 4. Reconsolidation block 24h after TS4 and its blockade with a 1h interval following TS4. Top. As in Figure 3. However the presence of LTM was tested 24h after the sequential stressor was given (n = 21). An ANOVA showed that LTM was not present in MT but was present in TS3 and TS4 ( $F_{4,80}=6.317$ ,  $p<0.05$ ). Bottom. As above but now the sequential stressor was given 1h after TS4. An ANOVA demonstrated that LTM was present in TS3, TS4 and MT ( $F_{3,558,64.052}=10.035$ ,  $p<0.05$ ). Thus delaying the sequential stressor for 1h allowed reconsolidation to occur. Values are means  $\pm$  s.e.m. \*\*Significant difference from TS1 (p at least  $<0.05$ )

Figure 5. Reconsolidation is not blocked by the presentation of crowding or handling alone. Top: Snails (n = 17) received similar training. However following TS4 they were crowded for 1h. An ANOVA (N=17;  $F_{4,64}=15.234$ ,  $p<0.05$ ) showed that there was LTM in sessions TS3, TS4 and the MT. Thus, the 1h crowding did not block reconsolidation. Middle: As above on snails (n = 19) only now snails were crowded for 3h immediately after TS4. An ANOVA ( $F_{4,72}=15.444$ ,  $p<0.05$ ) demonstrated that LTM was present in TS3, TS4 and MT. Thus the 3h crowding did not alter reconsolidation. Bottom. As above only after TS4 the sequential handling stimulus was present to the snails (n = 20). The sequential handling (ANOVA  $F_{4,76}=7.242$ ,  $p<0.05$ ) did not block reconsolidation as LTM was demonstrated in S3, TS4 and the MT. Values are means  $\pm$  s.e.m. \*\*Significant difference from TS1 (p at least  $<0.05$ )

438

## 439 References

440 Abrari, K., Rashidy-Pour, A., Semnanian, S., and Fathollahi, Y. (2008). Administration of corti-  
441 costerone after memory reactivation disrupts subsequent retrieval of a contextual conditioned  
442 fear mem-ory: dependence upon training intensity. *Neurobiol. Learn. Mem.* 89, 178–184.

443 Agren, T. (2014) Human reconsolidation: A reactivation and update. *Brain Res Bull* 105: 70 -  
444 82.

445 Akirav I. and Maroun, M., (2013) Stress modulation of reconsolidation. *Psychopharmacology*  
446 226:747–761

447 Alberini CM (2011): The role of reconsolidation and the dynamic process of long-term memory  
448 formation and storage. *Front Behav Neurosci* 7: 5–12.

449 Azami, S., Wagatsuma, A., Sadamoto, H., Hatakeyama, D., Usami, T., Fujie, M., Koyanagi, R.,  
450 Azumi, K., Fujito, Y., Lukowiak, K., and Ito, E. (2006). Altered Gene Activity Correlated with  
451 Long-term Memory Formation of Conditioned Taste Aversion in *Lymnaea*. *J. Neuro. Res*  
452 84:1610 - 1620.

453

454 Braun MH, Lukowiak K, Karnik V, Lukowiak K (2012) Differences in neuronal activity explain  
455 differences in memory forming abilities of different populations of *Lymnaea stagnalis*.  
456 *Neurobiol Learn Mem* 97: 173–182.

457 Brunet, A., Orr, S. P., Tremblay, J., Robertson, K., Nader, K., & Pitman, R. K. (2008). Effect of  
458 post-retrieval propranolol on psychophysiologic responding during subsequent script-driven  
459 traumatic imagery in post-traumatic stress disorder. *Journal of Psychiatric Research*, 42, 503-  
460 506.

461 Brunet, A., Poundja, J., Tremblay, J., Bui, E., Thomas, E., Orr, S. P., et al. (2011). Trauma  
462 reactivation under the influence of propranolol decreases posttraumatic stress symptoms and  
463 disorder: 3 open-label trials. *Journal of Clinical Psycho-pharmacology*, 31(4), 547-550.

- 464 Cocoz V, Maldonado H, Delorenzi A (2011) The enhancement of reconsolidation with a  
 465 naturalistic mild stressor improves the expression of a declarative memory in humans.  
 466 Neuroscience 185:61–72
- 467 Dalesman, S. And Lukowiak, K. (2010) Acute exposure to low environmental calcium alters  
 468 respiration and locomotion of *Lymnaea stagnalis* *J. Exp. Biol.* 213: 1471 - 1476  
 469
- 470 Dalesman, S. and Lukowiak, K. (2011a). Social snails: the effect of social isolation on cognition  
 471 is dependent on environmental context. *J. Exp. Biol.* **214**, 4179-4185.
- 472 Dalesman, S., and Lukowiak, K. (2011b) Interaction between environmental stressors mediated  
 473 via the same sensory pathway, *Communicative & Integrative Biology* 4: 717 - 719.  
 474
- 475 Dalesman, S., Karnik, V. and Lukowiak, K. (2011c). Sensory mediation of memory blocking  
 476 stressors in the pond snail *Lymnaea stagnalis*. *J. Exp. Biol.* **214**, 2528-2533.
- 477 Dalesman, S., Braun, M. H. and Lukowiak, K. (2011d). Low environmental calcium blocks long-  
 478 term memory formation in a freshwater pulmonate snail. *Neurobiol. Learn. Mem.* **95**, 393-403.
- 479 Dalesman, S., Rundle, S. D. and Lukowiak, K. (2011e). Microgeographic variability in long-  
 480 term memory formation in the pond snail, *Lymnaea stagnalis*. *Anim. Behav.* 82, 311-319.
- 481 Dalesman, S. and Lukowiak, K. (2012). How stress alters memory in "smart" snails. PLoS  
 482 ONE **7**, e32334.
- 483 Dalesman, S., Sunada, H., Teskey, M., and Lukowiak, K (2013) Combining stressors that  
 484 individually impede long-term memory blocks all memory processes. PLoS One e79561. doi:  
 485 10.1371/journal.pone.0079561
- 486 Debiec, J., (2012) Memory reconsolidation processes and posttraumatic stress disorder: Promises  
 487 and challenges of translational research. *Biol Psychiatry* 71: 284-285
- 488 Debiec, J., Bush, D. E., and Ledoux, J. E. (2011). Noradrenergic enhancement of reconsolidation  
 489 in the amygdala impairs extinction of conditioned fear in rats—a possible mechanism for the  
 490 persistence of traumatic memories in PTSD. *Depress. Anxiety* 28, 186–193.

- 491 Debiec J, and LeDoux JE. (2004). Disruption of reconsolidation but not consolidation of auditory  
492 fear conditioning by noradrenergic blockade in the amygdala. *Neurosci* 129: 267–272.
- 493 de Caigny, P., Lukowiak, K. (2008a) Crowding, an environmental stressor, block long-term  
494 memory formation in *Lymnaea*. *J Exp Biol.* 211:2678-88.
- 495 de Caigny, P. and Lukowiak, K. (2008b). A clash of stressors. *Communicative & Integrative*  
496 *Biology.* 1: 125- 127
- 497 Dudai Y. (2006). Reconsolidation: The advantage of being refocused. *Curr Opin Neurobiol* 16:  
498 174–178.
- 499 Eisenberg M, Kobilov T, Berman DE, Dudai Y. (2003). Stability of retrieved memory: inverse  
500 correlation with trace dominance. *Science* **301**:1102–1104
- 501 Fukushima H., Zhang, Y., Archbold, G., Ishikawa, R., Nader, K., and Kida, S. (2014)  
502 Enhancement of fear memory by retrieval through reconsolidation. *eLife* 2014;3:e02736. DOI:  
503 10.7554/eLife.02736
- 504 Karnik, V., Braun, M., Dalesman, S., and Lukowiak, K. (2012) Sensory input from the  
505 osphradium modulates the response to memory enhancing stressors in *Lymnaea stagnalis*. *J. Exp*  
506 *Biol.* 215: 536 - 542
- 507 Kim, J. J. and Diamond, D. M. (2002). The stressed hippocampus, synaptic plasticity and lost  
508 memories. *Nat. Rev. Neurosci.* **3**, 453-462.
- 509 Knezevic, B., Dalesman, S., Karnik, V., Byzitter, J. and Lukowiak, K. (2011). Low external  
510 environmental calcium levels prevent forgetting in *Lymnaea*. *J. Exp. Biol.* **214**, 2118-2124.
- 511 Loftus, E. (2003). Our changeable memories: legal and practical implications. *Nature Reviews*,  
512 4, 231–234.
- 513 Lukowiak, K., Ringseis, E., Spencer, G., Wildering, W., Syed, N. (1996) Operant conditioning  
514 of aerial respiratory behaviour in *Lymnaea stagnalis*. *J Exp Biol*; 199: 683-91
- 515 Lukowiak, K., Adatia, N., Krygier, D., Syed, N. Operant Conditioning in *Lymnaea*: Evidence for

- 516 Intermediate- and Long-term Memory. *Learn Mem.* (2000) May 7;7(3):140-150.
- 517 Lukowiak, K., Sangha, S., McComb, C., Varshney, N., Rosengger, D., Sadamoto, H. and  
 518 Scheibstock, A. (2003). Associative learning and memory in *Lymnaea stagnalis*: How well do  
 519 they remember? *J. Exp. Biol* 206: 2097 – 2103.
- 520
- 521 Lukowiak, K., Cotter, R., Westly, J., Ringseis, E., Spencer, G. Long-term memory of an  
 522 operantly conditioned respiratory behaviour pattern in *Lymnaea stagnalis*. (1998) *J Exp Biol.*  
 523 201:877–82
- 524 Lukowiak, K., Sangha, S., McComb, C., Varshney, N., Rosengger, D., Sadamoto, H.  
 525 and Scheibstock, A. (2003). Associative learning and memory in *Lymnaea stagnalis*: How  
 526 well do they remember? *J. Exp. Biol* 206: 2097 – 2103.
- 527 Lukowiak, K., Fras, M., Smyth, K., Wong, C, and Hittel, K. (2007) Reconsolidation and  
 528 memory infidelity in *Lymnaea*. *Neurobiol of Learn and Memory* 87: 547 – 560
- 529
- 530 Lukowiak K, Martens K, Rosenegger D, Browning K, de Caigny P, Orr M. (2008). The  
 531 perception of stress alters adaptive behaviours in *Lymnaea stagnalis*. *J Exp Biol.* 211:1747-56a,b  
 532
- 533 Lukowiak, K., Orr, M., de Caigny, P., Lukowiak, K.S., Rosenegger, D., Han, J.I., Dalesman, S.  
 534 (2010) Ecologically relevant stressors modify long-term memory formation in a model system.  
 535 *Behav Brain Res* 214:18-24.
- 536 Lukowiak, K., Sunada, H., Teskey, M., lukowiak, K.S., and Dalesman, S (2014)  
 537 Environmentally relevant stressors alter memory formation in the pond snail *Lymnaea*. *J. Exp.*  
 538 *Biol.* 217: 79
- 539 Maroun M. and Akirav I (2008) Arousal and stress effects on consolidation and reconsolidation  
 540 of recognition memory. *Neuropsychopharmacol* 33:394–405
- 541 Misanin JR, Miller RR, Lewis DJ (1968) Retrograde amnesia produced by electroconvulsive  
 542 shock after reactivation of a consolidated memory trace. *Science* 160:203–204.

- Nader, K., Schafe, G.E. and Le Doux, J.E. (2000a) Fear memories require protein synthesis in the amygdala for reconsolidation after retrieval. *Nature* **406**, 722–726
- Nader, K., Schafe, G. E., and Le Doux, J. E. (2000b). The labile nature of consolidation theory. *Nat. Rev. Neurosci.* 1, 216–219
- Nader, K., and Hardt, O. (2009). A single standard for memory: the case for reconsolidation. *Nat. Rev. Neurosci.* 10, 224–234
- Orr SP, Milad MR, Metzger LJ, Lasko NB, Gilbertson MW, Pitman RK (2006) Effects of beta blockade, PTSD diagnosis, and explicit threat on the extinction and retention of an aversively conditioned response. *Biol Psychol* 73:262–271
- Orr, M.V., El-Bekai, M., Lui, M., Watson, K., Lukowiak, K. Predator detection in *Lymnaea stagnalis*. *J Exp Biol.* (2007) 210: 4150-8.
- Orr, M.V., Lukowiak, K. Electrophysiological and behavioral evidence demonstrating that predator detection alters adaptive behaviours in the snail *Lymnaea*. *J Neurosci.* (2008) 28: 2726-34.
- Orr, MV., Hittel, K, and Lukowiak, K (2008). Comparing memory-forming capabilities between laboratory-reared and wild *Lymnaea*: Learning in the wild, a heritable component of snail memory. *J Exp Biol.* 211: 2807 - 2816.
- Orr, M. V., Hittel, K. and Lukowiak, K. (2009a). □Different strokes for different folks□: geographically isolated strains of *Lymnaea stagnalis* only respond to sympatric predators and have different memory forming capabilities. *J. Exp. Biol.* **212**, 2237- 2247.
- Orr, MV., Hittel, K, Lukowiak, K.S. Han, J., and Lukowiak, K (2009b) Differences in LTM-forming capability between geographically different strains of Alberta *Lymnaea stagnalis* are maintained whether they are trained in the lab or in the wild. *J. Exp Biol* 212: 3911 - 3918
- Parsons R, G, and Ressler, K. J., (2013) Implications of memory modulation for post-traumatic stress and fear disorders. *Nat Neuro* 16 146-153

Pitman, R.K., Sanders, K.M., Zusman, R.M., Healy, A.R., Cheema, F., Lasko, N.B., Cahill, L., Orr, S.P., (2002). Pilot study of secondary prevention of posttraumatic stress disorder with propranolol. *Biological Psychiatry* 51, 189–192.

Pitman RK, Delahanty DL (2005) Conceptually driven pharmacologic approaches to acute trauma. *CNS Spectr* 10:99–106

Przybylski, J., Roulet, P., and Sara, S. J. (1999). Attenuation of emotional and nonemotional memories after their reactivation: role of beta adrenergic receptors. *J. Neurosci.* 19, 6623–6628.

Reichert A., and Lee J., (2013) Memory reconsolidation in aversive and appetitive settings. *Frontiers in Behavioral Neurosci* 7: Article 118 doi: 10.3389/fnbeh.2013.00118

Sadamoto, H., Sato, H., Kobayashi, S., Murakami, J., Aonuma, H., Ando, H., Fujito, Y., Hamano, K., Awaji, M., Lukowiak, K., Urano, A., and Ito, E. (2003). CREB in the Pond Snail *Lymnaea stagnalis*: Cloning, Gene Expression and Function in Identifiable Neurons of the Central Nervous System. *J. Neurobiol.* 58: 455–66.

Sangha, S., Morrow, R., Smyth, K., Cooke, R., Lukowiak, K. (2003a) Cooling blocks ITM and LTM formation and preserves memory. *Neurobiol Learn Mem.*; 80:130-139.

Sangha, S., Scheibstock, A., McComb, C. and Lukowiak, K. (2003b). Intermediate and long-term memories of associative learning are differentially affected by transcription *versus* translation blockers in *Lymnaea*. *J. Exp. Biol.* **206**, 1605-1613.

Sangha, S., Scheibstock, A., and Lukowiak, K (2003c). Reconsolidation of a long-term memory in *Lymnaea* requires new protein and RNA synthesis and the soma of RPeD1. *J. Neuroscience* 23: 8034 – 8040.

Sara SJ (2000): Retrieval and reconsolidation: Toward a neurobiology of remembering. *Learn Mem* 7:73– 84.

Schacter, D. L. (1999). The seven sins of memory. *The American Psychologist*, 54, 182–203.



- 598 Scheibenstock, A., Krygier, D., Haque, Z., Syed, N. and Lukowiak, K. (2002). The soma of  
599 RPeD1 must be present for long-term memory formation of associative learning in *Lymnaea*. *J.*  
600 *Neurophysiol.* **88**, 1584-1591.
- 601 Schwabe L, and Wolf OT (2010) Learning under stress impairs memory formation. *Neurobiol*  
602 *Learn Mem* 93(2):183–188
- 603 Schwabe, L., Nader, K., Wolf, O. T., Beaudry, T., and Pruessner, J. C. (2012). Neural signature  
604 of reconsolidation impairments by propranolol in humans. *Biol. Psychiatry* 71, 380–386
- 605 Sharp, S., Thomas, C., Rosenberg, L., Rosenberg, M. & Meyer, W. III. (2010) Propranolol does  
606 not reduce risk for acute stress disorder in pediatric burn trauma. *J. Trauma* **68**, 193–197
- 607 Shors, T.J., (2004) Learning during stressful times. *Learn Mem.*;11:137-144.
- 608 Soeter, M., Kindt, M., (2011). Disrupting reconsolidation: pharmacological and behavioral  
609 manipulations. *Learning & Memory* 18, 357–366.
- 610 Soeter and Kindt, (2013) Reconsolidation in a human fear conditioning study: a test of extinction  
611 as updating mechanism. *Biol Psy* 92: 43 - 50.
- 612 Syed, N., Bulloch, A., and Lukowiak, K. (1990) *In vitro* reconstruction of the respiratory central  
613 pattern generator of the mollusk *Lymnaea*. *Science*. 250:282 -85
- 614 Syed, N., Ridgway, R., Lukowiak, K., and Bulloch, A. (1992) Transplantation and functional  
615 integration of an identified respiratory interneuron in *Lymnaea stagnalis*. *Neuron* 8:767-74.
- 616 Teskey, M.L., Lukowiak, K.S., Riaz, H., Dalesman, S., and Lukowiak, K (2012) ‘What’s Hot?’:  
617 The enhancing effects of thermal stress on long-term memory formation in *Lymnaea*. *J Exp Biol*  
618 215: 4322 - 4329.
- 619 Thonberg H, Fredriksson JM, Nedergaard J, Cannon B. (2002). A novel pathway for adrenergic  
620 stimulation of cAMP-response-element- binding protein (CREB) phosphorylation: Mediation via  
621 a  $\alpha_1$ - adrenoceptors and protein kinase C activation. *Biochem J* 264: 73–79.

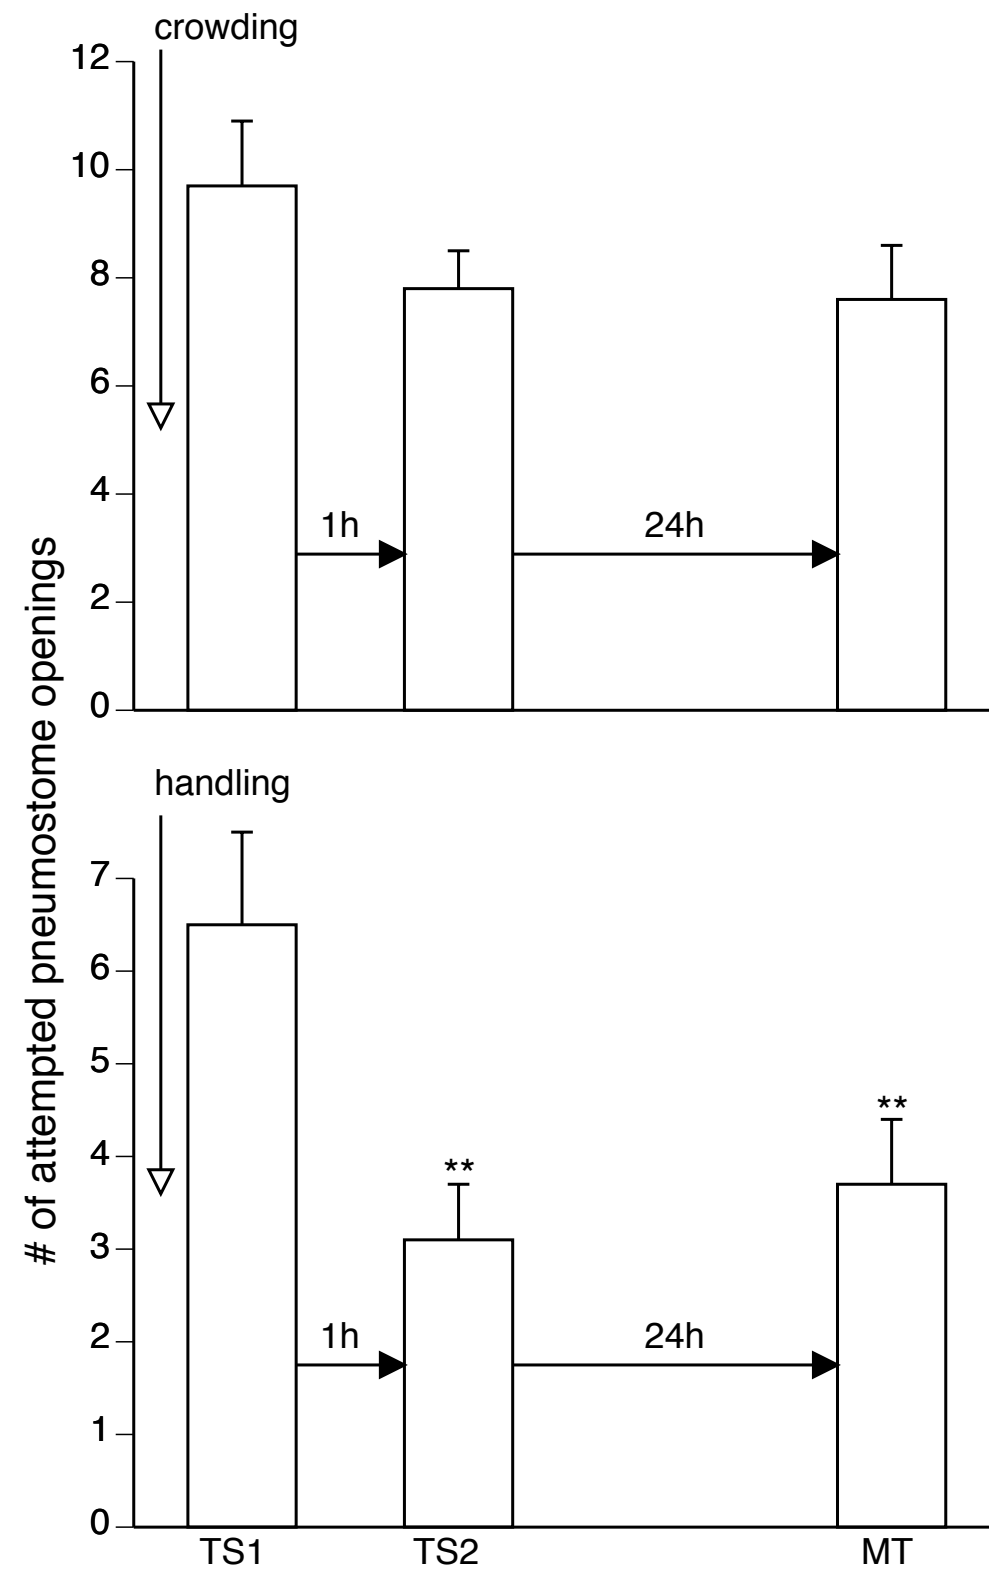

Fig 1

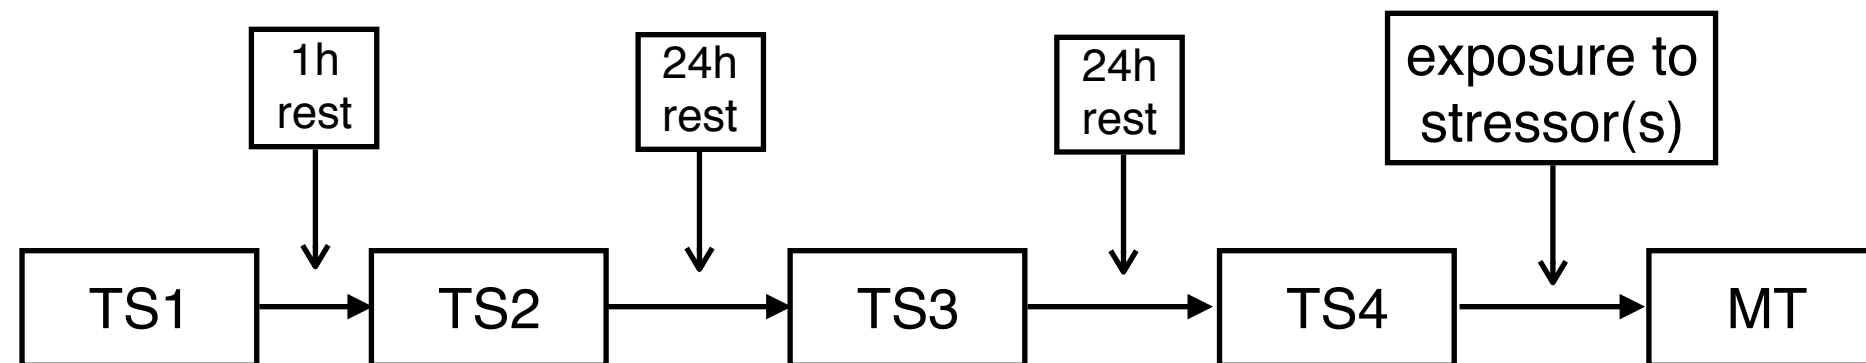

Fig 2

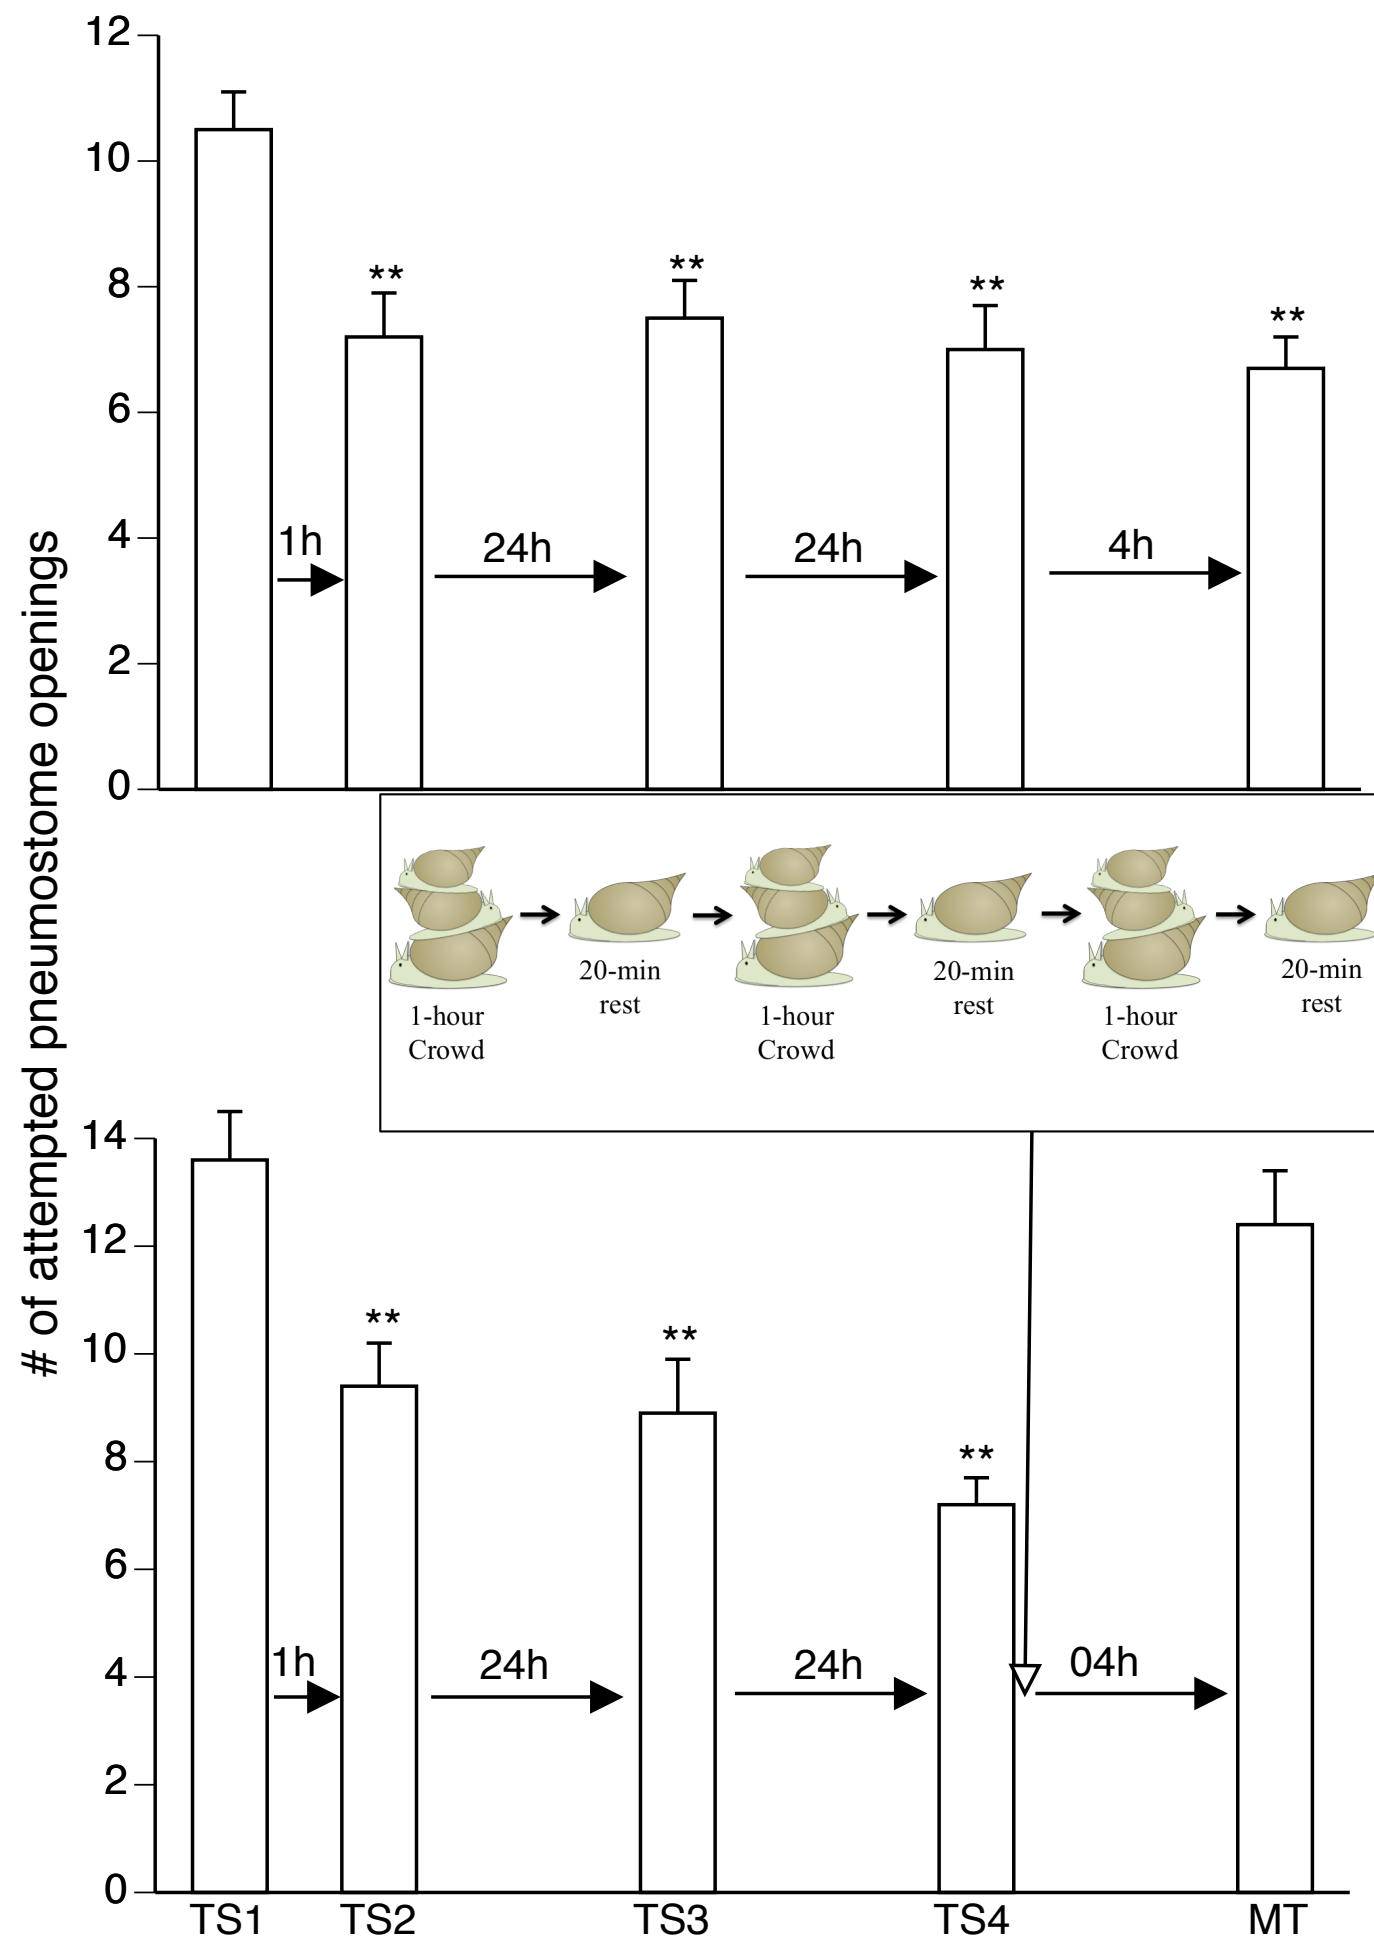

Fig 3

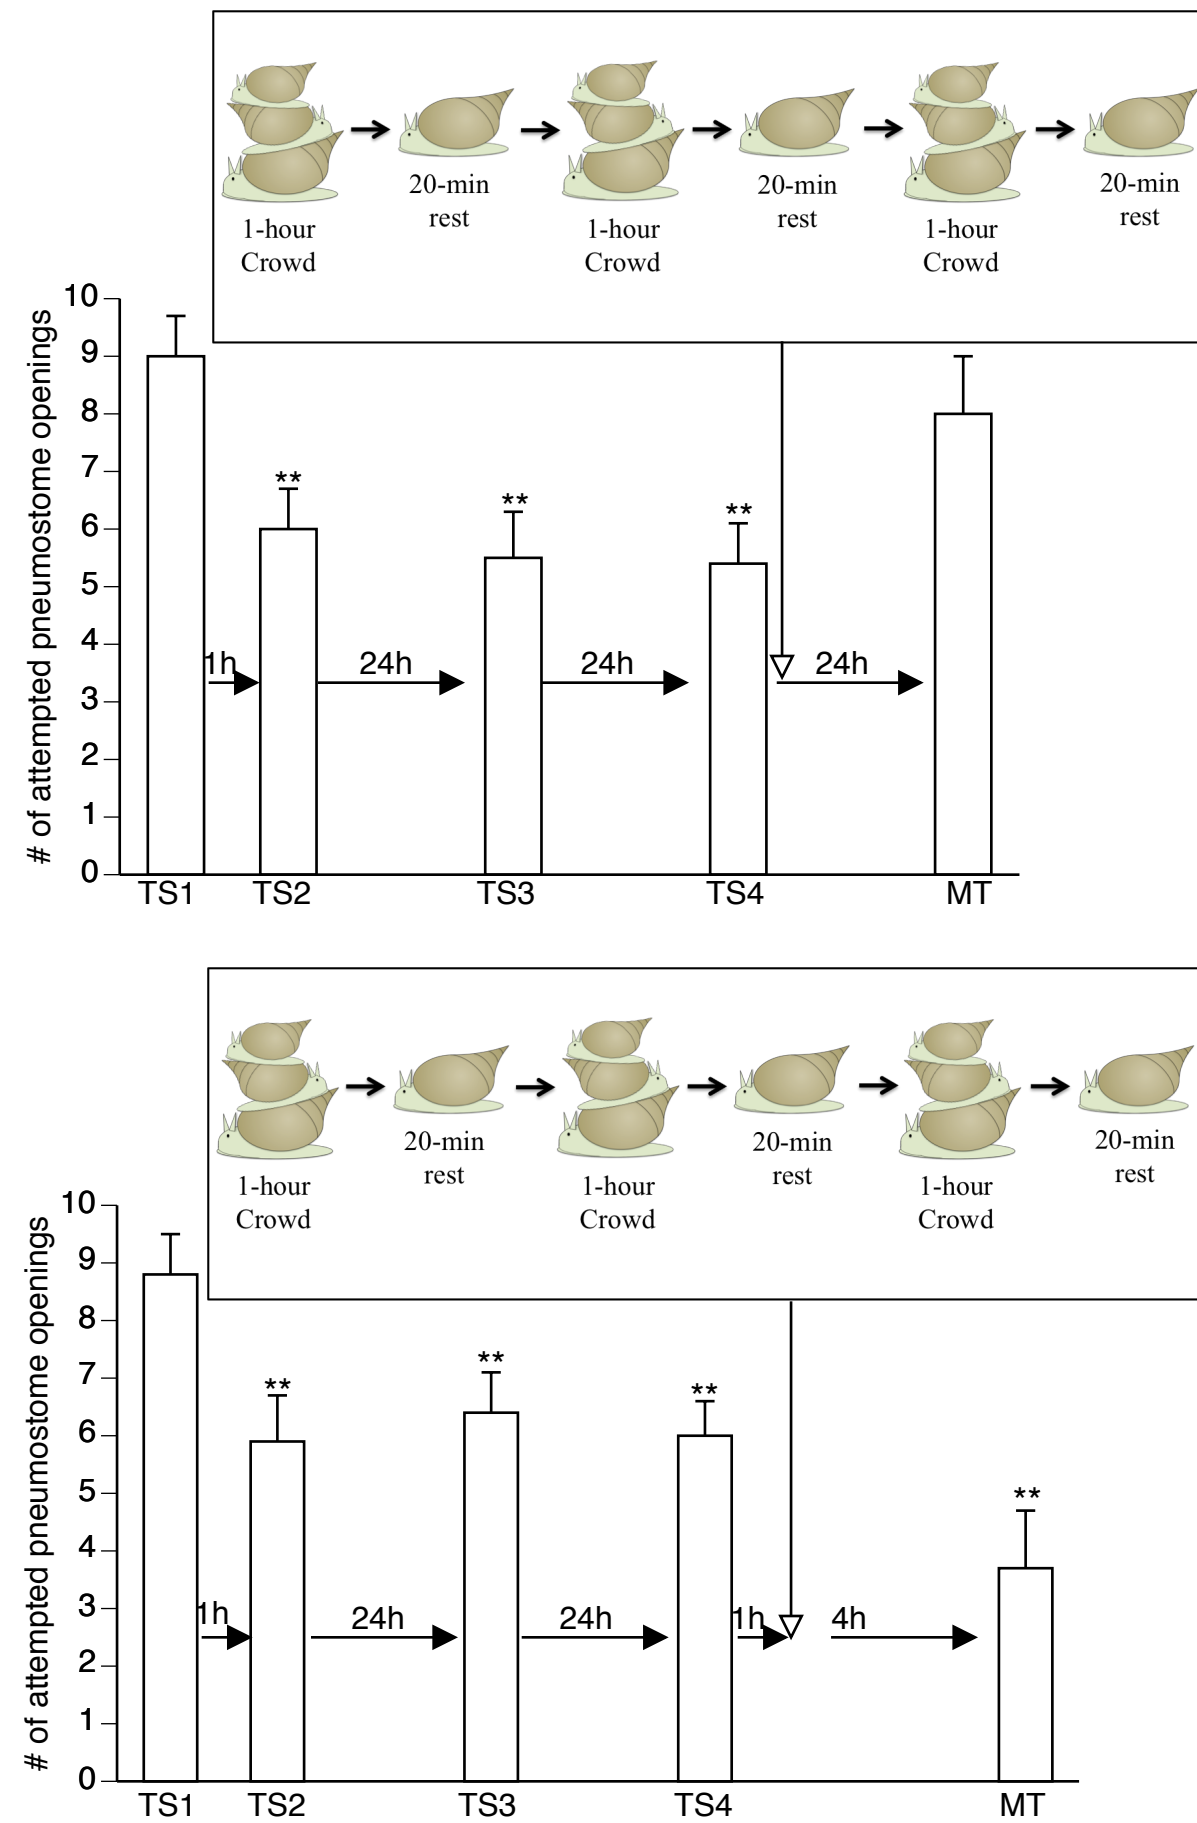

Fig 4

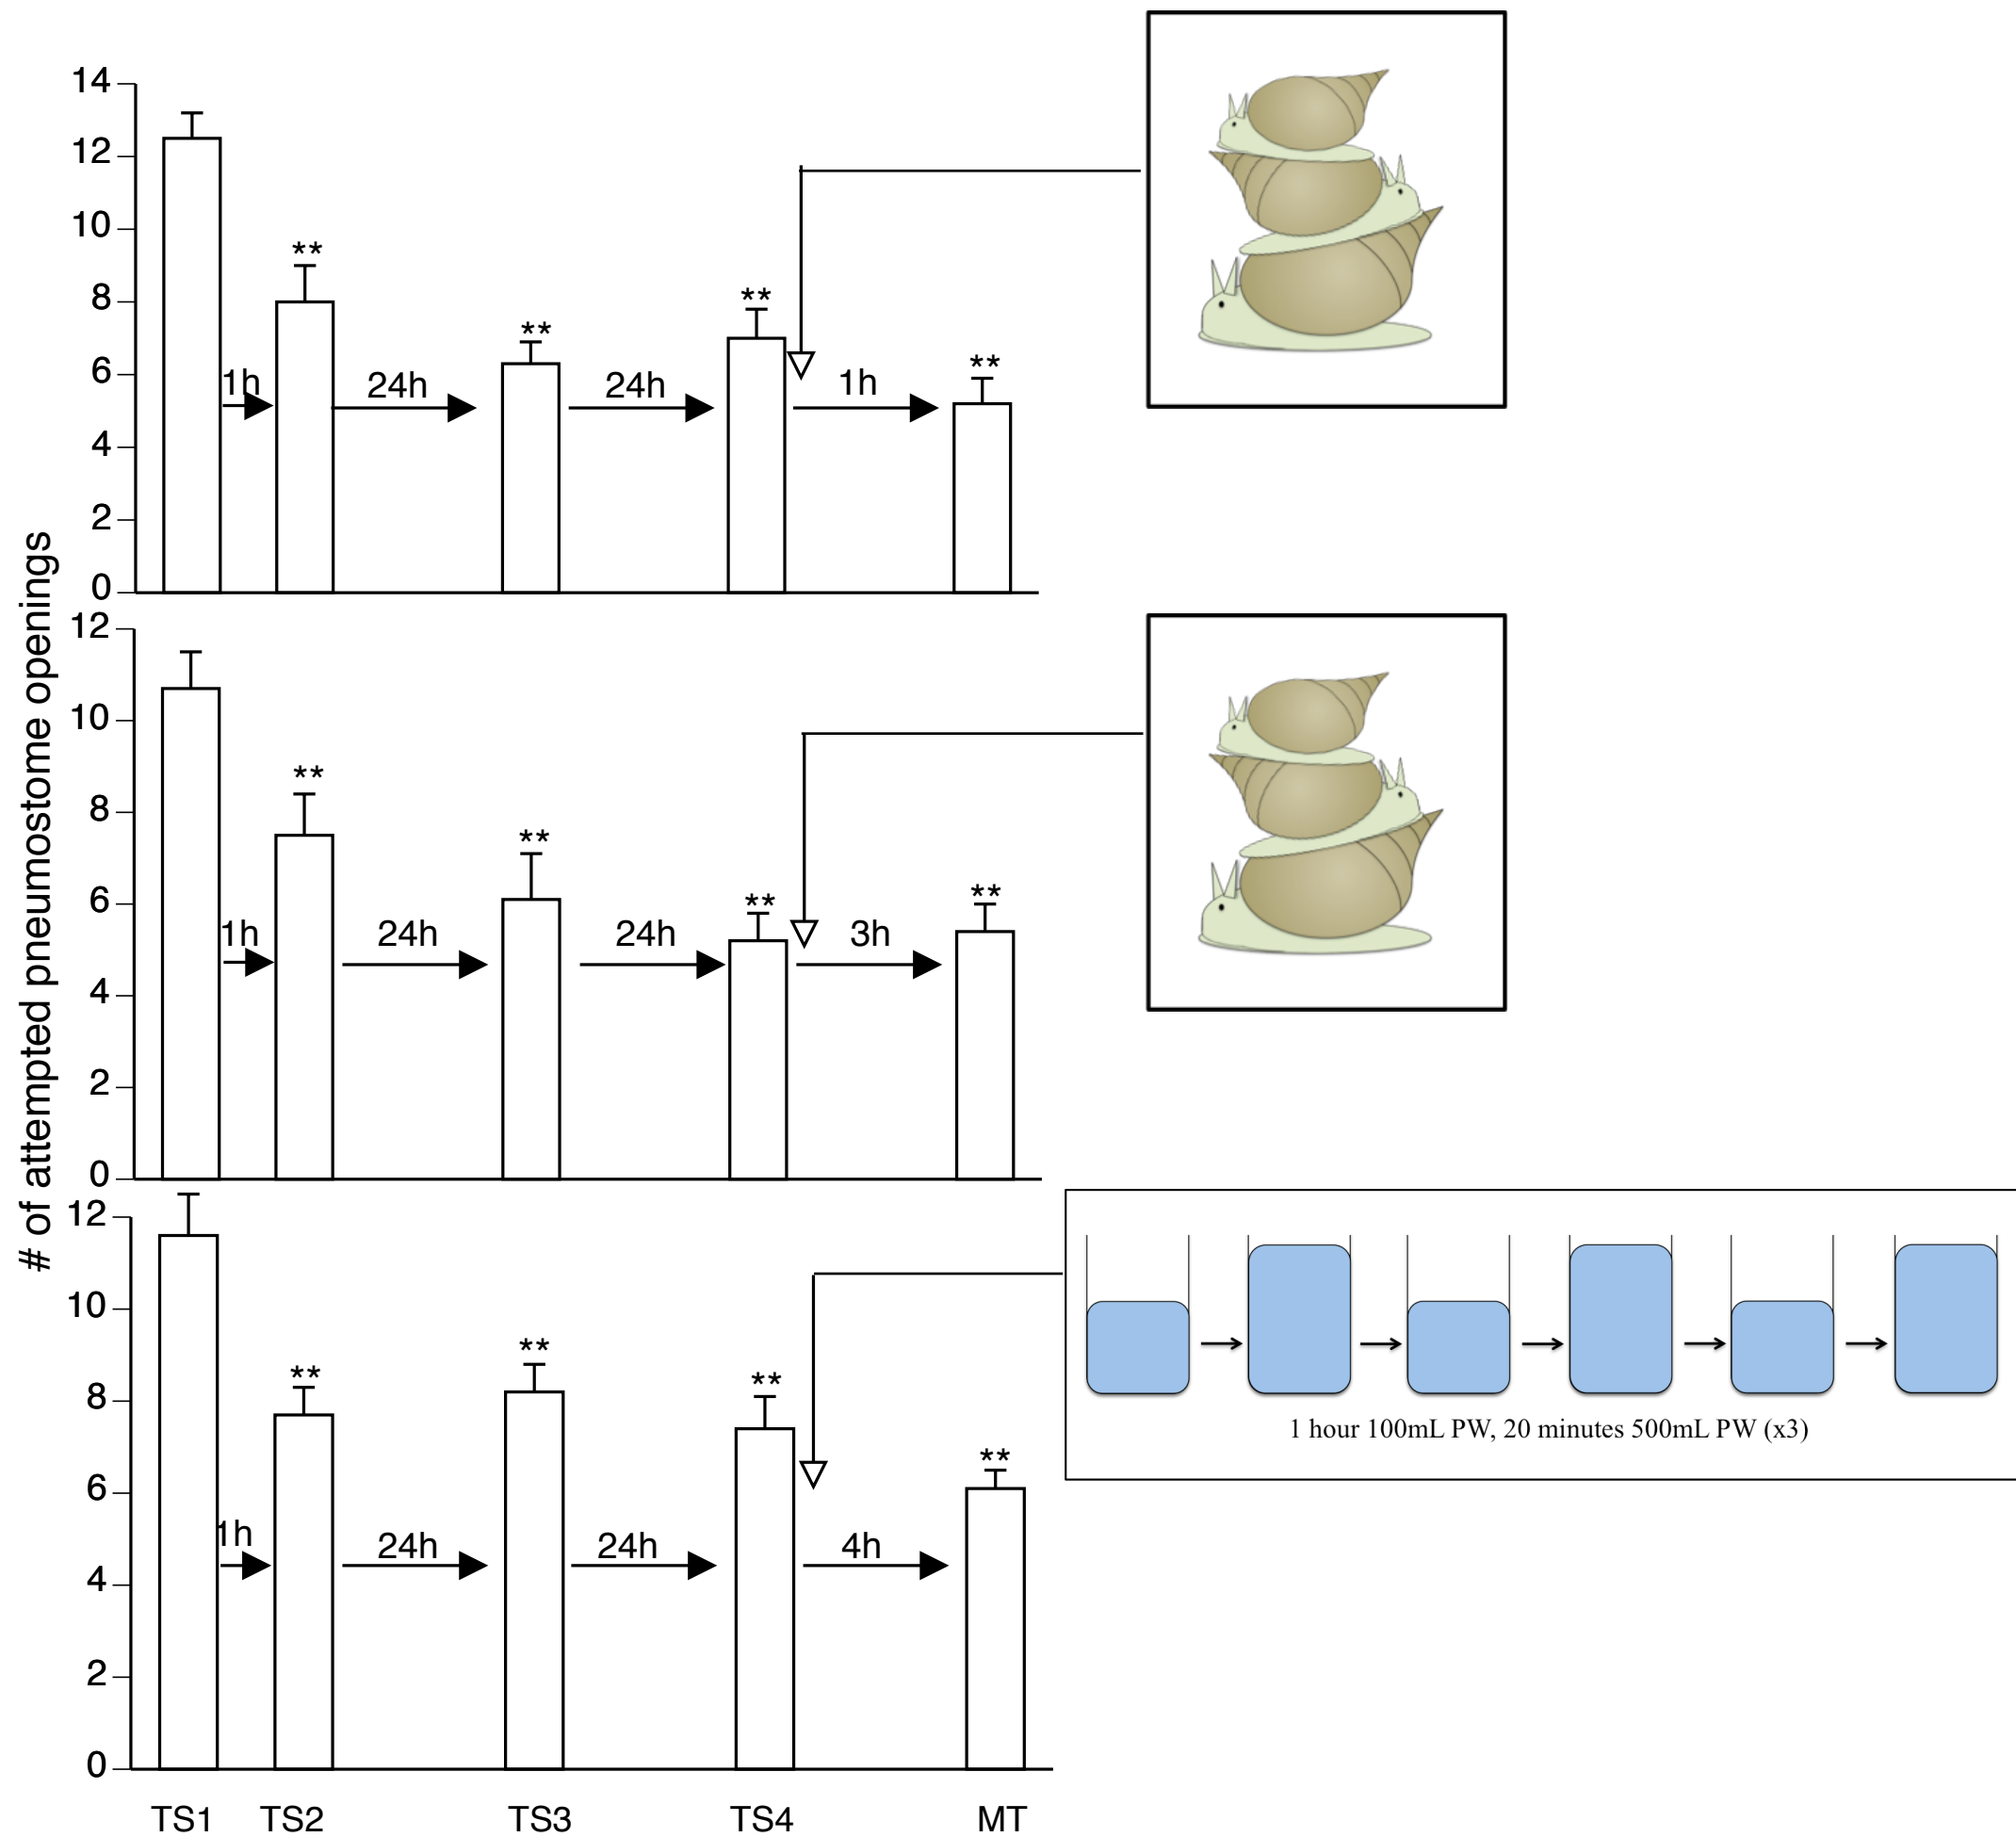

Fig 5
